# Supplementary material
Source: PubMed Central journal article supplement (PMC6365206)
Supplement: NIHMS975831-supplement-1.pdf [file NIHMS975831-supplement-1.pdf]

Outcome: Disease  
 Design: Unmatched case-control (1:0.85)  
 Hypothesis: Gene only  
 Desired power: 0.800000  
 Significance: 0.050000, 2-sided  
 Gene  
   Mode of inheritance: Dominant  
   Allele frequency: 0.0430 to 0.5000 by 0.1000  
 Disease model Summary parameters  
    $P_0$  0.003510 \* $k_P$  0.003510  
    $R_G$ : 1.0000 (\*indicates calculated value)

| Parameter | Null        | Full      | Reduced |
|-----------|-------------|-----------|---------|
| Gene      | $\beta_G=0$ | $\beta_G$ | —       |

  

| Frequency     | $R_G$         | N                |                  |
|---------------|---------------|------------------|------------------|
|               |               | Gene             | $k_P$            |
| 0.043000      | 1.0000        | Cannot calculate | 0.003510         |
|               | 1.5000        | 1152             | 0.003657         |
|               | 2.0000        | 355              | 0.003803         |
|               | 2.5000        | 188              | 0.003949         |
|               | 3.0000        | 123              | 0.004095         |
|               | 3.5000        | 91               | 0.004239         |
|               | 4.0000        | 71               | 0.004384         |
|               | 4.5000        | 59               | 0.004528         |
|               | <b>5.0000</b> | <b>50</b>        | <b>0.004671</b>  |
|               | 0.143000      | 1.0000           | Cannot calculate |
| 1.5000        |               | 492              | 0.003974         |
| 2.0000        |               | 162              | 0.004436         |
| 2.5000        |               | 90               | 0.004896         |
| 3.0000        |               | 62               | 0.005355         |
| 3.5000        |               | 48               | 0.005812         |
| <b>4.0000</b> |               | <b>39</b>        | <b>0.006267</b>  |
| 4.5000        |               | 33               | 0.006721         |
| 5.0000        |               | 29               | 0.007174         |
| 0.243000      |               | 1.0000           | Cannot calculate |
|               | 1.5000        | 419              | 0.004255         |
|               | 2.0000        | 144              | 0.004998         |
|               | 2.5000        | 84               | 0.005738         |
|               | 3.0000        | 60               | 0.006476         |
|               | 3.5000        | 47               | 0.007211         |
|               | <b>4.0000</b> | <b>39</b>        | <b>0.007943</b>  |
|               | 4.5000        | 34               | 0.008673         |
|               | 5.0000        | 30               | 0.009401         |
|               | 0.343000      | 1.0000           | Cannot calculate |
| 1.5000        |               | 441              | 0.004502         |
| 2.0000        |               | 158              | 0.005491         |
| 2.5000        |               | 94               | 0.006476         |
| 3.0000        |               | 68               | 0.007458         |
| 3.5000        |               | 55               | 0.008437         |
| 4.0000        |               | 46               | 0.009412         |
| <b>4.5000</b> |               | <b>40</b>        | <b>0.010383</b>  |
| 5.0000        |               | 36               | 0.011352         |
| 0.443000      |               | 1.0000           | Cannot calculate |
|               | 1.5000        | 529              | 0.004714         |

|               |           |                 |
|---------------|-----------|-----------------|
| 2.0000        | 195       | 0.005914        |
| 2.5000        | 119       | 0.007110        |
| 3.0000        | 88        | 0.008301        |
| 3.5000        | 71        | 0.009489        |
| 4.0000        | 60        | 0.010672        |
| 4.5000        | 53        | 0.011851        |
| <b>5.0000</b> | <b>48</b> | <b>0.013027</b> |

N is the number of cases required for the desired power

The required number of controls is  $0.85 \times N$

Outcome: Disease  
 Design: Unmatched case-control (1:0.85)  
 Hypothesis: Gene only  
 Desired power: 0.800000  
 Significance: 0.050000, 2-sided  
 Gene  
   Mode of inheritance: Log-additive  
   Allele frequency: 0.0430 to 0.5000 by 0.1000  
 Disease model Summary parameters  
    $P_0$  0.003510                     $*k_P$  0.003510  
    $R_G$ : 1.0000                        (\*indicates calculated value)

| Parameter | Null        | Full      | Reduced |
|-----------|-------------|-----------|---------|
| Gene      | $\beta_G=0$ | $\beta_G$ | —       |

  

| Frequency     | $R_G$         | N                |                  |
|---------------|---------------|------------------|------------------|
|               |               | Gene             | $k_P$            |
| 0.043000      | 1.0000        | Cannot calculate | 0.003510         |
|               | 1.5000        | 1060             | 0.003662         |
|               | 2.0000        | 322              | 0.003816         |
|               | 2.5000        | 169              | 0.003973         |
|               | 3.0000        | 110              | 0.004132         |
|               | 3.5000        | 80               | 0.004293         |
|               | 4.0000        | 62               | 0.004457         |
|               | 4.5000        | 51               | 0.004622         |
|               | <b>5.0000</b> | <b>43</b>        | <b>0.004789</b>  |
|               | 0.143000      | 1.0000           | Cannot calculate |
| 1.5000        |               | 373              | 0.004027         |
| 2.0000        |               | 118              | 0.004577         |
| 2.5000        |               | 64               | 0.005158         |
| <b>3.0000</b> |               | <b>43</b>        | <b>0.005769</b>  |
| 3.5000        |               | 33               | 0.006409         |
| 4.0000        |               | 26               | 0.007074         |
| 4.5000        |               | 22               | 0.007764         |
| 5.0000        |               | 19               | 0.008475         |
| 0.243000      |               | 1.0000           | Cannot calculate |
|               | 1.5000        | 259              | 0.004409         |
|               | 2.0000        | 85               | 0.005405         |
|               | 2.5000        | 48               | 0.006495         |
|               | <b>3.0000</b> | <b>33</b>        | <b>0.007673</b>  |
|               | 3.5000        | 26               | 0.008934         |
|               | 4.0000        | 21               | 0.010273         |
|               | 4.5000        | 18               | 0.011683         |
|               | 5.0000        | 16               | 0.013158         |
|               | 0.343000      | 1.0000           | Cannot calculate |
| 1.5000        |               | 221              | 0.004809         |
| 2.0000        |               | 75               | 0.006303         |
| <b>2.5000</b> |               | <b>43</b>        | <b>0.007984</b>  |
| 3.0000        |               | 31               | 0.009843         |
| 3.5000        |               | 24               | 0.011870         |
| 4.0000        |               | 20               | 0.014054         |
| 4.5000        |               | 17               | 0.016380         |
| 5.0000        |               | 16               | 0.018837         |
| 0.443000      |               | 1.0000           | Cannot calculate |
|               | 1.5000        | 210              | 0.005226         |

|               |           |                 |
|---------------|-----------|-----------------|
| 2.0000        | 73        | 0.007268        |
| <b>2.5000</b> | <b>43</b> | <b>0.009624</b> |
| 3.0000        | 31        | 0.012280        |
| 3.5000        | 25        | 0.015217        |
| 4.0000        | 21        | 0.018416        |
| 4.5000        | 18        | 0.021855        |
| 5.0000        | 16        | 0.025513        |

---

N is the number of cases required for the desired power

The required number of controls is  $0.85 \times N$

Outcome: Disease  
 Design: Unmatched case-control (1:0.85)  
 Hypothesis: Gene only  
 Desired power: 0.800000  
 Significance: 0.050000, 2-sided  
 Gene  
   Mode of inheritance: Recessive  
   Allele frequency: 0.0430 to 0.5000 by 0.1000  
 Disease model Summary parameters  
    $P_0$  0.003510 \* $k_P$  0.003510  
    $R_G$ : 1.0000 (\*indicates calculated value)

| Parameter | Null        | Full      | Reduced |
|-----------|-------------|-----------|---------|
| Gene      | $\beta_G=0$ | $\beta_G$ | —       |

  

| Frequency | $R_G$    | N                |                  |
|-----------|----------|------------------|------------------|
|           |          | Gene             | $k_P$            |
| 0.043000  | 1.0000   | Cannot calculate | 0.003510         |
|           | 1.5000   | 46338            | 0.003513         |
|           | 2.0000   | 13815            | 0.003516         |
|           | 2.5000   | 7105             | 0.003520         |
|           | 3.0000   | 4529             | 0.003523         |
|           | 3.5000   | 3236             | 0.003526         |
|           | 4.0000   | 2479             | 0.003529         |
|           | 4.5000   | 1990             | 0.003532         |
|           | 5.0000   | 1653             | 0.003536         |
|           | 0.143000 | 1.0000           | Cannot calculate |
| 1.5000    |          | 4306             | 0.003546         |
| 2.0000    |          | 1294             | 0.003581         |
| 2.5000    |          | 670              | 0.003617         |
| 3.0000    |          | 430              | 0.003652         |
| 3.5000    |          | 309              | 0.003687         |
| 4.0000    |          | 239              | 0.003722         |
| 4.5000    |          | 193              | 0.003757         |
| 5.0000    |          | 161              | 0.003792         |
| 0.243000  |          | 1.0000           | Cannot calculate |
|           | 1.5000   | 1580             | 0.003613         |
|           | 2.0000   | 482              | 0.003716         |
|           | 2.5000   | 253              | 0.003818         |
|           | 3.0000   | 165              | 0.003920         |
|           | 3.5000   | 120              | 0.004022         |
|           | 4.0000   | 94               | 0.004123         |
|           | 4.5000   | 77               | 0.004224         |
|           | 5.0000   | 65               | 0.004325         |
|           | 0.343000 | 1.0000           | Cannot calculate |
| 1.5000    |          | 868              | 0.003715         |
| 2.0000    |          | 271              | 0.003920         |
| 2.5000    |          | 145              | 0.004124         |
| 3.0000    |          | 96               | 0.004327         |
| 3.5000    |          | 71               | 0.004530         |
| 4.0000    |          | 56               | 0.004732         |
| 4.5000    |          | 47               | 0.004933         |
| 5.0000    |          | 40               | 0.005133         |
| 0.443000  |          | 1.0000           | Cannot calculate |
|           | 1.5000   | 591              | 0.003853         |

|               |           |                 |
|---------------|-----------|-----------------|
| 2.0000        | 190       | 0.004194        |
| 2.5000        | 104       | 0.004534        |
| 3.0000        | 70        | 0.004873        |
| 3.5000        | 53        | 0.005211        |
| 4.0000        | 43        | 0.005548        |
| <b>4.5000</b> | <b>36</b> | <b>0.005883</b> |
| 5.0000        | 31        | 0.006218        |

---

N is the number of cases required for the desired power

The required number of controls is  $0.85 \times N$
